# Supplementary material for: Effect of erythromycin residuals in food on the development of resistance in Streptococcus pneumoniae: an in vivo study in Galleria mellonella
Source: PeerJ. 2024 May 28;12:e17463. doi: 10.7717/peerj.17463 (PMC11141549; doi:10.7717/peerj.17463)
Supplement: Supplemental Information 2 [file peerj-12-17463-s002.xlsx]

## Sheet: colony count non AB
ERM EMA control
1	2	3	4	5	6
180	190	100	150	100	50
150	170	120	170	130	70
ERM EMA 1ADI
1	2	3	4	5	6
170	100	150	100	100	70
180	130	160	140	90	100
ERM EMA 10ADI
1	2	3	4	5	6
180	170	185	180	170	70
190	180	190	150	140	110
ERM WHO control
1	2	3	4	5	6
200	180	200	150	170	100
165	160	150	170	140	110
ERM WHO 1ADI
1	2	3	4	5	6
200	190	150	160	100	70
180	170	165	140	130	95
ERM WHO 10ADI
1	2	3	4	5	6
190	200	150	100	120	100
175	180	175	125	140	85

## Sheet: colony count AB
ERM EMA control
1	2	3	4	5
0	0	0	0	0
0	0	0	0	0
ERM EMA 1ADI
1	2	3	4	5
70	0	0	50	0
80	0	0	70	0
ERM EMA 10ADI
1	2	3	4	5
0	0	0	0	0
0	0	0	0	0
ERM WHO control
1	2	3	4	5
0	0	0	0	0
0	0	0	0	0
ERM WHO 1ADI
1	2	3	4	5
100	0	0	0	0
70	0	0	0	0
ERM WHO 10ADI
1	2	3	4	5
0	0	0	0	0
0	0	0	0	0

## Sheet: S. pneumoniae MICs
Dose	Strain ID	Groups	Erythromycin injected	MIC	Day of experiment
			ng	mg/L
1EMA ADI	2802b	Test	1.75	0.25	1
1EMA ADI	0303c	Test	1.75	0.190	4
1WHO ADI	1403b	Test	0.25	0.25	1
1WHO ADI	1403c	Test	0.25	0.38	1
No dose	ATCC 49619	Reference		0.064
No dose	Ctrl-B2	Control		0.125
No dose	Ctrl-B4	Control		0.094
